# Supplementary material for: Training old dogs to do new tricks: A general multi-pronged activation approach for natural product discovery in Actinomycetes
Source: Research Square preprint supplement (doi:10.21203/rs.3.rs-2055033/v1), 2022-09-15
Supplement: Supplementary file 1 [file 914870744fa550ae63829032.xlsx]

## Sheet: Content
Table	Description
S1	List of strains for this study, their 16S sequence and putative species
S2	Transformation efficiencies of 23 strains
S3	Global regulators, description
S4	Integration efficiencies
S5	List of 124 strain-activator combinations
S6	List of strain-media combinations fermented

## Sheet: Table S1
		rRNA blast results
Native strains ID*	16S sequence	Strain, Identity %
A1090	ACGGAGAGTTTGATCCTGGCTCAGGACGAACGCTGGCGGCGTGCTTAACACATGCAAGTCGAACGATGAAGCCCTTCGGGGTGGATTAGTGGCGAACGGGTGAGTAACACGTGGGCAATCTGCCCTTCACTCTGGGACAAGCCCTGGAAACGGGGTCTAATACCGGATACAACCACTGACCGCATGGTCGGGTGGTGGAAAGCTCCGGCGGTGAAGGATGAGCCCGCGGCCTATCAGCTTGTTGGTGAGGTAATGGCTCACCAAGGCGACGACGGGTAGCCGGCCTGAGAGGGCGACCGGCCACACTGGGACTGAGACACGGCCCAGACTCCTACGGGAGGCAGCAGTGGGGAATATTGCACAATGGGCGAAAGCCTGATGCAGCGACGCCGCGTGAGG…	Streptomyces lavendulae, 98.55%
A1123	TGGACTGAGACACGGCCCAGACTCCTACGGGAGGCAGCAGTAGGGAATTTTCCGCAATGGGCGAAAGCCTGACGGAGCAACGCCGCGTGAGTGAGGACGGCCTTCGGGTTGTAAAACTCTGTTCTTGAGGAAGAATTCCTTCCAGGCGAACAGCCTGGAAGGTTGACGGTACTCAAGGAGAAAGCCCCGGCTAACTACGTGCCAGCAGCCGCGGTAATACGTAGGGGGCGAGCGTTATCCGGAATTATTGGGCGTAAAGCGCGCGCAGGCGGCTGATTAAGTCAGGTGTGAAAGGCTGCGGCTCAACCGCAGAGCGGCACCTGAAACTGGTCAGCTTGAGTGCAGGAGAGGGGAGCGGAATTCCCGGTGTAGCGGTGGAATGCGTAGAGATCGGGAGGA…	Thermoactinomyces vulgaris, 100%
A1137	TTTTGGAGAGTTTGATCCTGGCTCAGGATGAACGCTGGCGGCGTGCCTAATACATGCAAGTCGAGCGGGAGAATCATCCTTCGGGATGAGGATCCAGCGGCGAACGGGTGAGTAACACGTGGGCAACCTGCCCGCAAGACCGGGATAACTCCGGGAAACCGGGGCTAATACCGGATAGTCCTTTTCCCCGCATGGGGAAAAGGGGAAAGGCGGCTTCGGCTGTCACTTGCGGATGGGCCCGCGGCGCATTAGCTGGTTGGTGAGGTAACGGCTCACCAAGGCGACGATGCGTAGCCGACCTGAGAGGGTGATCGGCCACACTGGGACTGAGACACGGCCCAGACTCCTACGGGAGGCAGCAGTAGGGAATTTTCCGCAATGGGCGAAAGCCTGACGGAG…	Thermoactinomyces vulgaris, 100%
A1301	TTTTGGAGAGTTTGATCCTGGCTCAGGATGAACGCTGGCGGCGTGCCTAATACATGCAAGTCGAGCGGGAGAATCATCCTTCGGGATGAGGATCCAGCGGCGAACGGGTGAGTAACACGTGGGCAACCTGCCCGCAAGACCGGGATAACTCCGGGAAACCGGGGCTAATACCGGATAGTCCTTTTCCCCGCATGGGGAAAAGGGGAAAGGCGGCTTCGGCTGTCACTTGCGGATGGGCCCGCGGCGCATTAGCTGGTTGGTGAGGTAACGGCTCACCAAGGCGACGATGCGTAGCCGACCTGAGAGGGTGATCGGCCACACTGGGACTGAGACACGGCCCAGACTCCTACGGGAGGCAGCAGTAGGGAATTTTCCGCAATGGGCGAAAGCCTGACGGAG…	Thermoactinomyces vulgaris, 100%
A1532	ACGGAGAGTTTGATCCTGGCTCAGGACGAACGCTGGCGGCGTGCTTAACACATGCAAGTCGAACGATGAAGCCCTTCGGGGTGGATTAGTGGCGAACGGGTGAGTAACACGTGGGCAATCTGCCCTTCACTCTGGGACAAGCCCTGGAAACGGGGTCTAATACCGGATACGAGCTTCCAAGGCATCTTGGAGGTTGGAAAGCTCCGGCGGTGAAGGATGAGCCCGCGGCCTATCAGCTTGTTGGTGAGGTAATGGCTCACCAAGGCGACGACGGGTAGCCGGCCTGAGAGGGCGACCGGCCACACTGGGACTGAGACACGGCCCAGACTCCTACGGGAGGCAGCAGTGGGGAATATTGCACAATGGGCGAAAGCCTGATGCAGCGACGCCGCGTGAGGG…	Streptomyces niveiscabiei, 98.62%
A1636	ACGGAGAGTTTGATCCTGGCTCAGGACGAACGCTGGCGGCGTGCTTAACACATGCAAGTCGAACGATGAAGCCCTTCGGGGTGGATTAGTGGCGAACGGGTGAGTAACACGTGGGCAATCTGCCCTGCACTCTGGGACAAGCCCTGGAAACGGGGTCTAATACCGGATATGACCGTCTTGGGCATCCTTGACGGTGTAAAGCTCCGGCGGTGCAGGATGAGCCCGCGGCCTATCAGCTTGTTGGTGAGGTAATGGCTCACCAAGGCGACGACGGGTAGCCGGCCTGAGAGGGCGACCGGCCACACTGGGACTGAGACACGGCCCAGACTCCTACGGGAGGCAGCAGTGGGGAATATTGCACAATGGGCGAAAGCCTGATGCAGCGACGCCGCGTGAGGG…	Streptomyces jeddahensis, 99.21%
A2056	ACGGAGAGTTTGATCCTGGCTCAGGACGAACGCTGGCGGCGTGCTTAACACATGCAAGTCGAACGATGAACCACTTCGGTGGGGATTAGTGGCGAACGGGTGAGTAACACGTGGGCAATCTGCCCTGCACTCTGGGACAAGCCCTGGAAACGGGGTCTAATACCGGATACTGACCTGCCGAGGCATCTCGGCGGGTGGAAAGCTCCGGCGGTGCAGGATGAGCCCGCGGCCTATCAGCTTGTTGGTGGGGTAATGGCCTACCAAGGCGACGACGGGTAGCCGGCCTGAGAGGGCGACCGGCCACACTGGGACTGAGACACGGCCCAGACTCCTACGGGAGGCAGCAGTGGGGAATATTGCACAATGGGCGAAAGCCTGATGCAGCGACGCCGCGTGAGG…	Streptomyces ardesiacus, 98.2%
A2278	ACGGAGAGTTTGATCCTGGCTCAGGACGAACGCTGGCGGCGTGCTTAACACATGCAAGTCGAACGATGAACCACTTCGGTGGGGATTAGTGGCGAACGGGTGAGTAACACGTGGGCAATCTGCCCTGCACTCTGGGACAAGCCCTGGAAACGGGGTCTAATACCGGATATGAGCCGCCCAGGCATCTGGGTGGCTGTAAAGCTCCGGCGGTGCAGGATGAGCCCGCGGCCTATCAGCTTGTTGGTGAGGTAACGGCTCACCAAGGCGACGACGGGTAGCCGGCCTGAGAGGGCGACCGGCCACACTGGGACTGAGACACGGCCCAGACTCCTACGGGAGGCAGCAGTGGGGAATATTGCACAATGGGCGAAAGCCTGATGCAGCGACGCCGCGTGAGGG…	Streptomyces anandii, 99.83%
A2957	GAAAGCTCCGGCGGTGAAGGATGAGCCCGCGGCCTATCAGCTTGTTGGTGGGGTAATGGCCTACCAAGGCGACGACGGGTAGCCGGCCTGAGAGGGCGACCGGCCACACTGGGACTGAGACACGGCCCAGACTCCTACGGGAGGCAGCAGTGGGGAATATTGCACAATGGGCGAAAGCCTGATGCAGCGACGCCGCGTGAGGGATGACGGCCTTCGGGTTGTAAACCTCTTTCAGCAGGGAAGAAGCGCAAGTGACGGTACCTGCAGAAGAAGCGCCGGCTAACTACGTGCCAGCAGCCGCGGTAATACGTAGGGCGCAAGCGTTGTCCGGAATTATTGGGCGTAAAGAGCTCGTAGGCGGCTTGTCACGTCGGATGTGAAAGCCCGGGGCTTAACCCC…	Streptomyces globisporus, 99.7%
A5252	GGTAGGGGAGATCGGAATTCCTGGTGTAGCGGTGAAATGCGCAGATATCAGGAGGAACACCGGTGGCGAAGGCGGATCTCTGGGCCGATACTGACGCTGAGGAGCGAAAGCGTGGGGAGCGAACAGGATTAGATACCCTGGTAGTCCACGCCGTAAACGTTGGGAACTAGGTGTGGGCGACATTCCACGTTGTCCGTGCCGCAGCTAACGCATTAAGTTCCCCGCCTGGGGAGTACGGCCGCAAGGCTAAAACTCAAAGGAATTGACGGGGGCCCGCACAAGCGGCGGAGCATGTGGCTTAATTCGACGCAACGCGAAGAACCTTACCAAGGCTTGACATACATCGGAAACATCCAGAGATGGGTGCCCCCTTGTGGTCGGTGTACAGGTGGTGCATGG…	Streptomyces aldersoniae, 100%
A5858	GACCGGCCACACTGGGACTGAGACACGGCCCAGACTCCTACGGGAGGCAGCAGTGGGGAATATTGCACAATGGGCGGAAGCCTGATGCAGCGACGCCGCGTGAGGGATGACGGCCTTCGGGTTGTAAACCTCTTTCAGCAGGGACGAAGCGCAAGTGACGGTACCTGCAGAAGAAGCGCCGGCCAACTACGTGCCAGCAGCCGCGGTAAGACGTAGGGCGCGAGCGTTGTCCGGATTTATTGGGCGTAAAGAGCTCGTAGGCGGCTTGTCGCGTCGACCGTGAAAACTTGGGGCTCAACCCCAGGCCTGCGGTCGATACGGGCAGGCTAGAGTTCGGTAGGGGAGACTGGAATTCCTGGTGTAGCGGTGAAATGCGCAGATATCAGGAGGAACACCGGT…	Micromonospora aurantiaca, 97.45%
A6562	ACGGAGAGTTTGATCCTGGCTCAGGACGAACGCTGGCGGCGTGCTTAACACATGCAAGTCGAACGATGAAGCCCTTCGGGGTGGATTAGTGGCGAACGGGTGAGTAACACGTGGGCAATCTGCCCTTCACTCTGGGACAAGCCCTGGAAACGGGGTCTAATACCGGATACGAGCCTCCTCCGCATGGTGGGGGTTGGAAAGCTCCGGCGGTGAAGGATGAGCCCGCGGCCTATCAGCTTGTTGGTGAGGTAATGGCTCACCAAGGCGACGACGGGTAGCCGGCCTGAGAGGGCGACCGGCCACACTGGGACTGAGACACGGCCCAGACTCCTACGGGAGGCAGCAGTGGGGAATATTGCACAATGGGCGAAAGCCTGATGCAGCGACGCCGCGTGAGGG…	Streptomyces filipinensis, 99.39%
A8567	ACGGAGAGTTTGATCCTGGCTCAGGACGAACGCTGGCGGCGTGCTTAACACATGCAAGTCGAACGATGAAGCCCTTCGGGGTGGATTAGTGGCGAACGGGTGAGTAACACGTGGGCAATCTGCCCTGCACTCTGGGACAAGCCCTGGAAACGGGGTCTAATACCGGATACGACCGCTGACCGCATGGTTGGTGGTGGAAAGCTCCGGCGGTGCAGGATGAGCCCGCGGCCTATCAGCTTGTTGGTGGGGTGATGGCCTACCAAGGCGACGACGGGTAGCCGGCCTGAGAGGGCGACCGGCCACACTGGGACTGAGACACGGCCCAGACTCCTACGGGAGGCAGCAGTGGGGAATATTGCACAATGGGCGAAAGCCTGATGCAGCGACGCCGCGTGAGGG…	Streptomyces abikoensis, 99.87%
A30639	GGCTTAACCCCGGGTCTGCAGTCGATACGGGCAGGCTAGAGTTCGGTAGGGGAGATCGGAATTCCTGGTGTAGCGGTGAAATGCGCAGATATCAGGAGGAACACCGGTGGCGAAGGCGGATCTCTGGGCCATTACTGACGCTGAGGAGCGAAAGCGTGGGGAGCGAACAGGATTAGATACCCTGGTAGTCCACGCTGTAAACGTTGGGCGCTAGGTGTGGGGGGCCTCTCCGGTTCCCTGTGCCGCAGCTAACGCATTAAGCGCCCCGCCTGGGGAGTACGGCCGCAAGGCTAAAACTCAAAGGAATTGACGGGGGCCCGCACAAGCGGCGGAGCATGCGGATTAATTCGATGCAACGCGAAGAACCTTACCTGGGTTTGACATGGCCGCAAAACTGTC…	Micromonospora aurantiaca, 98.81%
A33995	AAGTGACGGTACCTGCAGAAGAAGCGCCGGCTAACTACGTGCCAGCAGCCGCGGTAATACGTAGGGCGCAAGCGTTGTCCGGAATTATTGGGCGTAAAGAGCTCGTAGGCGGCTTGTCACGTCGGATGTGAAAGCCCGGGGCTTAACCCCGGGTCTGCATTCGATACGGGCTAGCTAGAGTGTGGTAGGGGAGATCGGAATTCCTGGTGTAGCGGTGAAATGCGCAGATATCAGGAGGAACACCGGTGGCGAAGGCGGATCTCTGGGCCATTACTGACGCTGAGGAGCGAAAGCGTGGGGAGCGAACAGGATTAGATACCCTGGTAGTCCACGCCGTAAACGTTGGGAACTAGGTGTTGGCGACATTCCACGTCGTCGGTGCCGCAGCTAACGCATTAA…	Streptomyces lunaelactis, 100%
A34001	AGTGACGGTACCTGCAGAAGAAGCGCCGGCCAACTACGTGCCAGCAGCCGCGGTAAGACGTAGGGCGCGAGCGTTGTCCGGATTTATTGGGCGTAAAGAGCTCGTAGGCGGCTTGTCGCGTCGACCGTGAAAACCTGGGGCTCAACCCCAGGCCTGCGGTCGATACGGGCAGGCTAGAGTTCGGTAGGGGAGATCGGAATTCCTGGTGTAGCGGTGAAATGCGCAGATATCAGGAGGAACACCGGTGGCGAAGGCGGATCTCTGGGCCGATACTGACGCTGAGGAGCGAAAGCGTGGGGAGCGAACAGGATTAGATACCCTGGTAGTCCACGCTGTAAACGTTGGGCGCTAGGTGTGGGGGGCCTCTCCGGTTCCCTGTGCCGCAGCTAACGCATTAAG…	Micromonospora maritima, 99.72%
A40707	ACGGAGAGTTTGATCCTGGCTCAGGACGAACGCTGGCGGCGTGCTTAACACATGCAAGTCGAACGATGAAGCCTTTCGGGGTGGATTAGTGGCGAACGGGTGAGTAACACGTGGGCAATCTGCCCTTCACTCTGGGACAAGCCCTGGAAACGGGGTCTAATACCGGATAACACTCTGTCCCGCATGGGACGGGGTTAAAAGCTCCGGCGGTGAAGGATGAGCCCGCGGCCTATCAGCTTGTTGGTGGGGTAATGGCCTACCAAGGCGACGACGGGTAGCCGGCCTGAGAGGGCGACCGGCCACACTGGGACTGAGACACGGCCCAGACTCCTACGGGAGGCAGCAGTGGGGAATATTGCACAATGGGCGAAAGCCTGATGCAGCGACGCCGCGTGAGGG…	Streptomyces luridiscabiei, 99.8%
A40926	CCGATACTGACGCTGAGGAGCGAAAGCGTGGGGAGCGAACAGGATTAGATACCCTGGTAGTCCACGCCGTAAACGGTGGGCACTAGGTGTGGGCAACATTCCACGTTGTCCGTGCCGCAGCTAACGCATTAAGTGCCCCGCCTGGGGAGTACGGCCGCAAGGCTAAAACTCAAAGGAATTGACGGGGGCCCGCACAAGCGGCGGAGCATGTGGCTTAATTCGACGCAACGCGAAGAACCTTACCAAGGCTTGACATACACCGGAAACGTCCAGAGATGGGCGCCCCCTTGTGGTCGGTGTACAGGTGGTGCATGGCTGTCGTCAGCTCGTGTCGTGAGATGTTGGGTTAAGTCCCGCAACGAGCGCAACCCTTGTCCCGTGTTGCCAGCAGGCCCTTGT…	Streptomyces thermocarboxydus, 99.51%
A53961	ATTCGGCGTAAAGAGCTCGGAGGCTGCTGGCCGCGTCGACCGTGAAAACTTGGGGCTCAACCCCAAGCCTGCGGTCGATACGGGCAGGCTAGAGTTCGGTAGGGGAGATCGGAATTCCTGGTGTAGCGGTGAAATGCGCAGATATCAGGAGGAACACCGGTGGCGAAGGCGGATCTCTGGGCCGATACTGACGCTGAGGAGCGAAAGCGTGGGGAGCGAACAGGATTAGATACCCTGGTAGTCCACGCCGTAAACGGTGGGCACTAGGTGTGGGGGTCTTCCACGGTTCCGTGCCGCAGCTAACGCATTAAGCGCCCCGCCTGGGGAGTACGGCCGCAAGGCTAAAACTCAAAGGAATTGACGGGGGCCCGCACAAGCGGCGGAGCATGCGGATTAATT…	Micromonospora aurantiaca, 98.06%
A61715	ACGGAGAGTTTGATCCTGGCTCAGGACGAACGCTGGCGGCGTGCTTAACACATGCAAGTCGAACGATGAACCTCCTTCGGGAGGGGATTAGTGGCGAACGGGTGAGTAACACGTGGGCAATCTGCCCTGCACTCTGGGACAAGCCCTGGAAACGGGGTCTAATACCGGATACGACACGGGATCGCATGATCTTCCGTGTGGAAAGCTCCGGCGGTGCAGGATGAGCCCGCGGCCTATCAGCTTGTTGGTGGGGTAATGGCCTACCAAGGCGACGACGGGTAGCCGGCCTGAGAGGGCGACCGGCCACACTGGGACTGAGACACGGCCCAGACTCCTACGGGAGGCAGCAGTGGGGAATATTGCACAATGGGCGCAAGCCTGATGCAGCGACGCCGCGTG…	Streptomyces albofaciens, 99.73%
A80510	AACTACGTGCCAGCAGCCGCGGTAATACGTAGGGCGCAAGCGTTGTCCGGAATTATTGGGCGTAAAGAGCTCGTAGGTGGCTGGTCGCGTCTGCCGTGAAAGCCCGCAGCTTAACTGCGGGTCTGCGGTGGATACGGGCCGGCTAGAGGCAGGTAGGGGAAAGTGGAATTCCTGGTGTAGCGGTGAAATGCGCAGATATCAGGAGGAACACCGGTGGCGAAGGCGGCTCTCTGGGCCTTACCTGACGCTGAGGAGCGAAAGCGTGGGGAGCGAACAGGATTAGATACCCTGGTAGTCCACGCTGTAAACGTTGGGCGCTAGGTGTGGGGGGCCTCTCCGGTTCCCTGTGCCGCAGCTAACGCATTAAGCGCCCCGCCTGGGGAGTACGGCCGCAAGGCT…	Micromonospora maritima, 97.18%
T108	TTGGAGAGTTTGATCCTGGCTCAGGACGAACGCTGGCGGCGTGCTTAACACATGCAAGTCGAGCGGAAAGGCCCTTCGGGGTACTCGAGCGGCGAACGGGTGAGTAACACGTGAGCAACCTGCCCCAGGCTTTGGGATAACCCCGGGAAACCGGGGCTAATACCGAATATGACCTTGCACCGCATGGTGTTTGGTGGAAAGTTTTTCGGCTTGGGATGGGCTCGCGGCCTATCAGCTTGTTGGTGGGGTGATGGCCTACCAAGGCGACGACGGGTAGCCGGCCTGAGAGGGCGACCGGCCACACTGGGACTGAGACACGGCCCAGACTCCTACGGGAGGCAGCAGTGGGGAATATTGCACAATGGGCGGAAGCCTGATGCAGCGACGCCGCGTGAGGGA…	Micromonospora aurantiaca, 99.53%
T265	ACGGAGAGTTTGATCCTGGCTCAGGACGAACGCTGGCGGCGTGCTTAACACATGCAAGTCGAACGATGAACCCACTTCGGTGGGGGATTAGTGGCGAACGGGTGAGTAACACGTGGGCAATCTGCCCTGCACTCTGGGACAAGCCCTGGAAACGGGGTCTAATACCGGATACGACCACTTCAGGCATCTGATGGTGGTGGAAAGCTCCGGCGGTGCAGGATGAGCCCGCGGCCTATCAGCTAGTTGGTGAGGTAACGGCTCACCAAGGCGACGACGGGTAGCCGGCCTGAGAGGGCGACCGGCCACACTGGGACTGAGACACGGCCCAGACTCCTACGGGAGGCAGCAGTGGGGAATATTGCACAATGGGCGAAAGCCTGATGCAGCGACGCCGCGTGA…	Streptomyces fradiae, 99.8%
T298	ACGGAGAGTTTGATCCTGGCTCAGGACGAACGCTGGCGGCGTGCTTAACACATGCAAGTCGAACGATGAACCCACTTCGGTGGGGGATTAGTGGCGAACGGGTGAGTAACACGTGGGCAATCTGCCCTGCACTCTGGGACAAGCCCTGGAAACGGGGTCTAATACCGGATACGACCACTTCAGGCATCTGATGGTGGTGGAAAGCTCCGGCGGTGCAGGATGAGCCCGCGGCCTATCAGCTAGTTGGTGAGGTAACGGCTCACCAAGGCGACGACGGGTAGCCGGCCTGAGAGGGCGACCGGCCACACTGGGACTGAGACACGGCCCAGACTCCTACGGGAGGCAGCAGTGGGGAATATTGCACAATGGGCGAAAGCCTGATGCAGCGACGCCGCGTGA…	Streptomyces fradiae, 99.69%
T343	ACGGAGAGTTTGATCCTGGCTCAGGACGAACGCTGGCGGCGTGCTTAACACATGCAAGTCGAACGATGAACCACTTCGGTGGGGATTAGTGGCGAACGGGTGAGTAACACGTGGGCAATCTGCCCTGCACTCTGGGACAAGCCCTGGAAACGGGGTCTAATACCGGATACTGACCCGCTTGGGCATCCAAGCGGTTCGAAAGCTCCGGCGGTGCAGGATGAGCCCGCGGCCTATCAGCTTGTTGGTGAGGTAATGGCTCACCAAGGCGACGACGGGTAGCCGGCCTGAGAGGGCGACCGGCCACACTGGGACTGAGACACGGCCCAGACTCCTACGGGAGGCAGCAGTGGGGAATATTGCACAATGGGCGAAAGCCTGATGCAGCGACGCCGCGTGAGG…	Streptomyces albogriseolus, 100%
T354	ACGGAGAGTTTGATCCTGGCTCAGGACGAACGCTGGCGGCGTGCTTAACACATGCAAGTCGAACGATGAACCGCTTTCGGGCGGGGATTAGTGGCGAACGGGTGAGTAACACGTGGGCAATCTGCCCTGCACTCTGGGACAAGCCCTGGAAACGGGGTCTAATACCGGATATGACTGTCCATCGCATGGTGGATGGTGTAAAGCTCCGGCGGTGCAGGATGAGCCCGCGGCCTATCAGCTTGTTGGTGAGGTAGTGGCTCACCAAGGCGACGACGGGTAGCCGGCCTGAGAGGGCGACCGGCCACACTGGGACTGAGACACGGCCCAGACTCCTACGGGAGGCAGCAGTGGGGAATATTGCACAATGGGCGAAAGCCTGATGCAGCGACGCCGCGTGAG…	Streptomyces sampsonii, 99.93%
T676	ACGGAGAGTTTGATCCTGGCTCAGGACGAACGCTGGCGGCGTGCTTAACACATGCAAGTCGAACGATGAACCACTTCGGTGGGGATTAGTGGCGAACGGGTGAGTAACACGTGGGCAATCTGCCCTGCACTCTGGGACAAGCCCTGGAAACGGGGTCTAATACCGGATACTGATCCTTCTGGGCATCCAGAGGGTTCGAAAGCTCCGGCGGTGCAGGATGAGCCCGCGGCCTATCAGCTTGTTGGTGAGGTAATGGCTCACCAAGGCGACGACGGGTAGCCGGCCTGAGAGGGCGACCGGCCACACTGGGACTGAGACACGGCCCAGACTCCTACGGGAGGCAGCAGTGGGGAATATTGCACAATGGGCGCAAGCCTGATGCAGCGACGCCGCGTGAGG…	Streptomyces viridochromogenes, 99.17%
T1236	CGCAAGCCTGATGCAGCGACGCCGCGTGAGGGATGACGGCCTTCGGGTTGTAAACCTCTTTCAGCAGGGAAGAAGCGAGAGTGACGGTACCTGCAGAAGAAGCGCCGGCTAACTACGTGCCAGCAGCCGCGGTAATACGTAGGGCGCAAGCGTTGTCCGGAATTATTGGGCGTAAAGAGCTCGTAGGCGGCTTGTCGCGTCGGTTGTGAAAGCCCGGGGCTTAACCCCGGGTCTGCAGTCGATACGGGCAGGCTAGAGTTCGGTAGGGGAGATCGGAATTCCTGGTGTAGCGGTGAAATGCGCAGATATCAGGAGGAACACCGGTGGCGAAGGCGGATCTCTGGGCCGATACTGACGCTGAGGAGCGAAAGCGTGGGGAGCGAACAGGATTAGATACCC…	Streptomyces ardesiacus, 99.91%
T4680	AGCTTGTTGGTGAGGTAACGGCTCACCAAGGCGACGACGGGTAGCCGGCCTGAGAGGGCGACCGGCCACACTGGGACTGAGACACGGCCCAGACTCCTACGGGAGGCAGCAGTGGGGAATATTGCACAATGGGCGAAAGCCTGATGCAGCGACGCCGCGTGAGGGATGACGGCCTTCGGGTTGTAAACCTCTTTCAGCAGGGAAGAAGCGCAAGTGACGGTACCTGCAGAAGAAGCGCCGGCTAACTACGTGCCAGCAGCCGCGGTAATACGTAGGGCGCGAGCGTTGTCCGGAATTATTGGGCGTAAAGAGCTCGTAGGCGGCTTGTCGCGTCGATTGTGAAAGCCCGGGGCTTAACCCCGGGTCTGCAGTCGATACGGGCAGGCTAGAGTGTGGTAG…	Streptomyces hirsutus, 99.21%
T36	TACAGGTGGTGCATGGCTGTCGTCAGCTCGTGTCGTGAGATGTTGGGTTAAGTCCCGCAACGAGCGCAACCCTTGTTCGATGTTGCCAGCGGTTCGGGCGGGGACTCATCGAAGACTGCCGGGGTCAACTCGGAGGAAGGTGGGGATGACGTCAAGTCATCATGCCCCTTATGTCCAGGGCTTCACGCATGCTACAATGGCCGGTACAAAGGGCTGCGATACCGTGAGGTGGAGCGAATCCCAAAAAGCCGGTCTCAGTTCGGATCGGGGTCTGCAACTCGACCCCGTGAAGTCGGAGTCGCTAGTAATCGCAGATCAGCAACGCTGCGGTGAATACGTTCCCGGGCCTTGTACACACCGCCCGTCACGTCACGAAAGTCGGCAACACCCGAAGCCGGT…	Dactylosporangium solaniradicis, 99.8%
T39	ACGGAGAGTTTGATCCTGGCTCAGGACGAACGCTGGCGGCGTGCTTAACACATGCAAGTCGAACGATGAACCACTTCGGTGGGGATTAGTGGCGAACGGGTGAGTAACACGTGGGCAATCTGCCCTTCACTCTGGGACAAGCCCTGGAAACGGGGTCTAATACCGGATATGAGCCTGGGAGGCATCTCCCGGGCTGTAAAGCTCCGGCGGTGAAGGATGAGCCCGCGGCCTATCAGCTTGTTGGTGAGGTAATGGCTCACCAAGGCGACGACGGGTAGCCGGCCTGAGAGGGCGACCGGCCACACTGGGACTGAGACACGGCCCAGACTCCTACGGGAGGCAGCAGTGGGGAATATTGCACAATGGGCGAAAGCCTGATGCAGCGACGCCGCGTGAGGG…	Streptomyces niveoruber, 99.07%
T175	GGTGTAAAGCTCCGGCGGTGCAGGATGAGCCCGCGGCCTATCAGCTTGTTGGTGAGGTAGTGGCTCACCAAGGCGACGACGGGTAGCCGGCCTGAGAGGGCGACCGGCCACACTGGGACTGAGACACGGCCCAGACTCCTACGGGAGGCAGCAGTGGGGAATATTGCACAATGGGCGAAAGCCTGATGCAGCGACGCCGCGTGAGGGATGACGGCCTTCGGGTTGTAAACCTCTTTCAGCAGGGAAGAAGCGAAAGTGACGGTACCTGCAGAAGAAGCGCCGGCTAACTACGTGCCAGCAGCCGCGGTAATACGTAGGGCGCAAGCGTTGTCCGGAATTATTGGGCGTAAAGAGCTCGTAGGCGGCTTGTCACGTCGGTTGTGAAAGCCCGGGGCTTAA…	Streptomyces niveoruber, 99.92%
T168	GGTGTAAAGCTCCGGCGGTGCAGGATGAGCCCGCGGCCTATCAGCTTGTTGGTGAGGTAGTGGCTCACCAAGGCGACGACGGGTAGCCGGCCTGAGAGGGCGACCGGCCACACTGGGACTGAGACACGGCCCAGACTCCTACGGGAGGCAGCAGTGGGGAATATTGCACAATGGGCGAAAGCCTGATGCAGCGACGCCGCGTGAGGGATGACGGCCTTCGGGTTGTAAACCTCTTTCAGCAGGGAAGAAGCGAAAGTGACGGTACCTGCAGAAGAAGCGCCGGCTAACTACGTGCCAGCAGCCGCGGTAATACGTAGGGCGCAAGCGTTGTCCGGAATTATTGGGCGTAAAGAGCTCGTAGGCGGCTTGTCACGTCGGTTGTGAAAGCCCGGGGCTTAA…	Streptomyces sampsonii, 99.92%
T118	GTGCTTACACATGCAAGTCGAACGATGAACCGCTTTCGGGCGGGGATTAGTGGCGAACGGGTGAGTAACACGTGGGCAATCTGCCCTGCACTCTGGGACAAGCCCTGGAAACGGGGTCTAATACCGGATATGACTGTCCATCGCATGGTGGATGGTGTAAAGCTCCGGCGGTGCAGGATGAGCCCGCGGCCTATCAGCTTGTTGGTGAGGTAGTGGCTCACCAAGGCGACGACGGGTAGCCGGCCTGAGAGGGCGACCGGCCACACTGGGACTGAGACACGGCCCAGACTCCTACGGGAGGCAGCAGTGGGGAATATTGCACAATGGGCGAAAGCCTGATGCAGCGACGCCGCGTGAGGGATGACGGCCTTCGGGTTGTAAACCTCTTTCAGCAGGGAA…	Streptomyces sampsonii, 95.57%
T10	AGACACGGCCCAGACTCCTACGGGAGGCAGCAGTGGGGAATATTGCACAATGGGCGGAAGCCTGATGCAGCGACGCCGCGTGAGGGATGACGGCCTTCGGGTTGTAAACCTCTTTCAGCAGGGACGAAGCGCAAGTGACGGTACCTGCAGAAGAAGCGCCGGCCAACTACGTGCCAGCAGCCGCGGTAAGACGTAGGGCGCGAGCGTTGTCCGGATTTATTGGGCGTAAAGAGCTCGTAGGCGGCTTGTCGCGTCGACTGTGAAAACCCGTGGCTCAACTGCGGGCCTGCAGTCGATACGGGCAGGCTAGAGTTCGGTAGGGGAGACTGGAATTCCTGGTGTAGCGGTGAAATGCGCAGATATCAGGAGGAACACCGGTGGCGAAGGCGGGTCTCTGGG…	Micromonospora maris, 99.67%
T1415	ACGGAGAGTTTGATCCTGGCTCAGGACGAACGCTGGCGGCGTGCTTAACACATGCAAGTCGAACGATGAACCTCCTTCGGGAGGGGATTAGTGGCGAACGGGTGAGTAACACGTGGGCAATCTGCCCTGCACTCTGGGACAAGCCCTGGAAACGGGGTCTAATACCGGATACTGACCCGCTTGGGCATCCAAGCGGTTCGAAAGCTCCGGCGGTGCAGGATGAGCCCGCGGCCTATCAGCTTGTTGGTGAGGTAATGGCTCACCAAGGCGACGACGGGTAGCCGGCCTGAGAGGGCGACCGGCCACACTGGGACTGAGACACGGCCCAGACTCCTACGGGAGGCAGCAGTGGGGAATATTGCACAATGGGCGAAAGCCTGATGCAGCGACGCCGCGTGA…	Streptomyces variabilis, 99.93%
T1416	ACGGAGAGTTTGATCCTGGCTCAGGACGAACGCTGGCGGCGTGCTTAACACATGCAAGTCGAACGATGAACCACTTCGGTGGGGATTAGTGGCGAACGGGTGAGTAACACGTGGGCAATCTGCCCTGCACTCTGGGACAAGCCCTGGAAACGGGGTCTAATACCGGATACTGACCCGCTTGGGCATCCAAGCGGTTCGAAAGCTCCGGCGGTGCAGGATGAGCCCGCGGCCTATCAGCTTGTTGGTGAGGTAATGGCTCACCAAGGCGACGACGGGTAGCCGGCCTGAGAGGGCGACCGGCCACACTGGGACTGAGACACGGCCCAGACTCCTACGGGAGGCAGCAGTGGGGAATATTGCACAATGGGCGAAAGCCTGATGCAGCGACGCCGCGTGAGG…	Streptomyces tendae, 99.21%
T12	CCGATACTGACGCTGAGGAGCGAAAGCGTGGGGAGCGAACAGGATTAGATACCCTGGTAGTCCACGCCGTAAACGGTGGGCACTAGGTGTGGGCAACATTCCACGTTGTCCGTGCCGCAGCTAACGCATTAAGTGCCCCGCCTGGGGAGTACGGCCGCAAGGCTAAAACTCAAAGGAATTGACGGGGGCCCGCACAAGCGGCGGAGCATGTGGCTTAATTCGACGCAACGCGAAGAACCTTACCAAGGCTTGACATACACCGGAAAGCATTAGAGATAGTGCCCCCCTTGTGGTCGGTGTACAGGTGGTGCATGGCTGTCGTCAGCTCGTGTCGTGAGATGTTGGGTTAAGTCCCGCAACGAGCGCAACCCTTGTCCCGTGTTGCCAGCAGGCCCTTGT…	Streptomyces flaveolus, 100%
A11345	TGAAAGCTCCGGCGGTGGAGGATGAGCCCGCGGCCTATCAGCTTGTTGGTGGGGTGATGGCCTACCAAGGCGACGACGGGTAGCCGGCCTGAGAGGGCGACCGGCCACACTGGGACTGAGACACGGCCCAGACTCCTACGGGAGGCAGCAGTGGGGAATATTGCACAATGGGCGGAAGCCTGATGCAGCGACGCCGCGTGAGGGATGACGGCCTTCGGGTTGTAAACCTCTTTCAGCAGGGAAGAAGCGTGAGTGACGGTACCTGCAGAAGAAGCGCCGGCTAACTACGTGCCAGCAGCCGCGGTAATACGTAGGGCGCAAGCGTTGTCCGGAATTATTGGGCGTAAAGAGCTCGTAGGCGGCTTGTCGCGTCGGATGTGAAAGCCCGGGGCTCAACCC…	Streptomyces odonnellii, 99.87%
A8274	AAAGTTTTTCGGCCTGGGATGGGCTCGCGGCCTATCAGCTTGTTGGTGGGGTGATGGCCTACCAAGGCGACGACGGGTAGCCGGCCTGAGAGGGCGACCGGCCACACTGGGACTGAGACACGGCCCAGACTCCTACGGGAGGCAGCAGTGGGGAATATTGCACAATGGGCGGAAGCCTGATGCAGCGACGCCGCGTGAGGGATGACGGCCTTCGGGTTGTAAACCTCTTTCAGCAGGGACGAAGCGCAAGTGACGGTACCTGCAGAAGAAGCACCGGCCAACTACGTGCCAGCAGCCGCGGTAAGACGTAGGGTGCGAGCGTTGTCCGGATTTATTGGGCGTAAAGAGCTCGTAGGCGGCTTGTCGCGTCGACCGTGAAAACTTGGGGCTCAACCCCAA…	Micromonospora oryzae, 99.77%
A34053	ACGGAGAGTTTGATCCTGGCTCAGGACGAACGCTGGCGGCGTGCTTAACACATGCAAGTCGAACGATGAAGCCTTTCGGGGTGGATTAGTGGCGAACGGGTGAGTAACACGTGGGCAATCTGCCCTTCACTCTGGGACAAGCCCTGGAAACGGGGTCTAATACCGGATAACACTCTGTCCCGCATGGGACGGGGTTAAAAGCTCCGGCGGTGAAGGATGAGCCCGCGGCCTATCAGCTTGTTGGTGGGGTAATGGCCTACCAAGGCGACGACGGGTAGCCGGCCTGAGAGGGCGACCGGCCACACTGGGACTGAGACACGGCCCAGACTCCTACGGGAGGCAGCAGTGGGGAATATTGCACAATGGGCGAAAGCCTGATGCAGCGACGCCGCGTGAGGG…	Streptomyces luridiscabiei, 99.8%
A44034	ACGGAGAGTTTGATCCTGGCTCAGGACGAACGCTGGCGGCGTGCTTAACACATGCAAGTCGAACGATGAACCTCCTTCGGGAGGGGATTAGTGGCGAACGGGTGAGTAACACGTGGGCAATCTGCCCTTCACTCTGGGACAAGCCCTGGAAACGGGGTCTAATACCGGATACGACACGGGGTCGCATGACCTCCGTGTGGAAAGCTCCGGCGGTGAAGGATGAGCCCGCGGCCTATCAGCTTGTTGGTGGGGTGATGGCCTACCAAGGCGACGACGGGTAGCCGGCCTGAGAGGGCGACCGGCCACACTGGGACTGAGACACGGCCCAGACTCCTACGGGAGGCAGCAGTGGGGAATATTGCACAATGGGCGAAAGCCTGATGCAGCGACGCCGCGTGA…	Streptomyces kronopolitis, 99.34%
A4217	GGCTCACCAAGGCGACGACGGGTAGCCGGCCTGAGAGGGCGACCGGCCACACTGGGACTGAGACACGGCCCAGACTCCTACGGGAGGCAGCAGTGGGGAATATTGCACAATGGGCGAAAGCCTGATGCAGCGACGCCGCGTGAGGGATGACGGCCTTCGGGTTGTAAACCTCTTTCAGCAGGGAAGAAGCGAGAGTGACGGTACCTGCAGAAGAAGCGCCGGCTAACTACGTGCCAGCAGCCGCGGTAATACGTAGGGCGCAAGCGTTGTCCGGAATTATTGGGCGTAAAGAGCTCGTAGGCGGCTTGTCACGTCGATTGTGAAAGCTCGGGGCTTAACCCCGAGTCTGCAGTCGATACGGGCTAGCTAGAGTGTGGTAGGGGAGATCGGAATTCCTGG…	Streptomyces durhamensis, 99.52%
A2705	ATGGAGAGTTTGATCCTGGCTCAGGACGAACGCTGGCGGCGTGCTTAACACATGCAAGTCGAGCGGAAAGGCCCCTTCGGGGGTACTCGAGCGGCGAACGGGTGAGTAACACGTGAGCAACCTGCCCCTGACTCTGGGATAAGCCCGGGAAACTGGGTCTAATACCGGATATAACCACTGGTCGCATGGTCTGGTGGTGGAAAGTTTTTCGGTTGGGGATGGGCTCGCGGCCTATCAGCTTGTTGGTGGGGTGATGGCCTACCAAGGCGACGACGGGTAACCGGCCTGAGAGGGCGACCGGTCACACTGGGACTGAGACACGGCCCAGACTCCTACGGGAGGCAGCAGTGGGGAATATTGCGCAATGGGCGGAAGCCTGACGCAGCGACGCCGCGTGGG…	Spirillospora tritici, 98.81%
A58051	ACGGAGAGTTTGATCCTGGCTCAGGACGAACGCTGGCGGCGTGCTTAACACATGCAAGTCGAACGATGAACCACTTCGGTGGGGATTAGTGGCGAACGGGTGAGTAACACGTGGGCAATCTGCCCTTCACTCTGGGACAAGCCCTGGAAACGGGGTCTAATACCGGATACCACCCTCACGGGCATCTGTGAGGGTTGAAAGCTCCGGCGGTGAAGGATGAGCCCGCGGCCTATCAGCTTGTTGGTGAGGTAACGGCTCACCAAGGCGACGACGGGTAGCCGGCCTGAGAGGGCGACCGGCCACACTGGGACTGAGACACGGCCCAGACTCCTACGGGAGGCAGCAGTGGGGAATATTGCACAATGGGCGAAAGCCTGATGCAGCGACGCCGCGTGAGGG…	Streptomyces cyaneochromogenes, 99.48%
T271	ACGGAGAGTTTGATCCTGGCTCAGGACGAACGCTGGCGGCGTGCTTAACACATGCAAGTCGAACGATGAACCTCCTTCGGGAGGGGATTAGTGGCGAACGGGTGAGTAACACGTGGGCAATCTGCCCTGCACTCTGGGACAAGCCCTGGAAACGGGGTCTAATACCGGATACGACCATCGGGGGCATCCCCGGTGGTGGAAAGCTCCGGCGGTGCAGGATGAGCCCGCGGCCTATCAGCTTGTTGGTGGGGTGACGGCCTACCAAGGCGACGACGGGTAGCCGGCCTGAGAGGGCGACCGGCCACACTGGGACTGAGACACGGCCCAGACTCCTACGGGAGGCAGCAGTGGGGAATATTGCACAATGGGCGAAAGCCTGATGCAGCGACGCCGCGTGAG…	Streptomyces tendae strain ATCC 19812, 97.31%
T302	AGGCGGCTTGTCACGTCGGTTGTGAAAGCCCGGGGCTTAACCCCGGGTCTGCAGTCGATACGGGCAGGCTAGAGTTCGGTAGGGGAGATCGGAATTCCTGGTGTAGCGGTGAAATGCGCAGATATCAGGAGGAACACCGGTGGCGAAGGCGGATCTCTGGGCCGATACTGACGCTGAGGAGCGAAAGCGTGGGGAGCGAACAGGATTAGATACCCTGGTAGTCCACGCCGTAAACGGTGGGCACTAGGTGTGGGCGACATTCCACGTCGTCCGTGCCGCAGCTAACGCATTAAGTGCCCCGCCTGGGGAGTACGGCCGCAAGGCTAAAACTCAAAGGAATTGACGGGGGCCCGCACAAGCGGCGGAGCATGTGGCTTAATTCGACGCAACGCGAAGAAC…	Streptomyces tendae, 99.69%
T1312	ACGGAGAGTTTGATCCTGGCTCAGGACGAACGCTGGCGGCGTGCTTAACACATGCAAGTCGAACGATGAACCACTTCGGTGGGGATTAGTGGCGAACGGGTGAGTAACACGTGGGCAATCTGCCCTGCACTCTGGGACAAGCCCTGGAAACGGGGTCTAATACCGGATACTGACCCGCTTGGGCATCCAAGCGGTTCGAAAGCTCCGGCGGTGCAGGATGAGCCCGCGGCCTATCAGCTTGTTGGTGAGGTAATGGCTCACCAAGGCGACGACGGGTAGCCGGCCTGAGAGGGCGACCGGCCACACTGGGACTGAGACACGGCCCAGACTCCTACGGGAGGCAGCAGTGGGGAATATTGCACAATGGGCGAAAGCCTGATGCAGCGACGCCGCGTGAGG…	Streptomyces albogriseolus, 100%
T1195	ACGGAGAGTTTGATCCTGGCTCAGGACGAACGCTGGCGGCGTGCTTAACACATGCAAGTCGAACGATGAACCACTTCGGTGGGGATTAGTGGCGAACGGGTGAGTAACACGTGGGCAATCTGCCCTGCACTCTGGGACAAGCCCTGGAAACGGGGTCTAATACCGGATACTGACCCGCTTGGGCATCCAAGCGGTTCGAAAGCTCCGGCGGTGCAGGATGAGCCCGCGGCCTATCAGCTTGTTGGTGAGGTAATGGCTCACCAAGGCGACGACGGGTAGCCGGCCTGAGAGGGCGACCGGCCACACTGGGACTGAGACACGGCCCAGACTCCTACGGGAGGCAGCAGTGGGGAATATTGCACAATGGGCGAAAGCCTGATGCAGCGACGCCGCGTGAGG…	Streptomyces tendae, 99.21%
T1425	TGAGTAACACGTGTGCAATCTGCTTTGCATTCTGGGACATTTCCTGTTAACGGGGTCTAATACCGGATACTGACCCGCTTGGGCATCCAAGCGGTTCGCATGCTCCGGCGGTGCAGGATGAGCCCGTGGCCTATCTGCTTGTTGGTGAGGTAATGGCTCACCAAGGCAACGACGGGTAGCCGGCCTGAGAGGGCGACCGGCCACACTGGGACTGAGACACGGCCCAGACTCCTACGGGAGGCAGCATTGGGGAATATTGCACAATGGGCGAAAGCCTGATGCAGCGACGCCGCTTGAGGGATGACGGCCTTCGGGTTGTAAACCTCTTTCAGCAGGGAAGAAGCGAAAGTGACGGTACCTGCATAATAAGCGCCGGCTAACTACGTGCCAGCAGCCGCG…	Streptomyces labedae, 97.22%
T1628	ACACATGCAGTCGACGATGAACCGCTTTCGGGCGGGGATTAGTGGCGAACGGGTGAGTAACAGGTGGGCAATCTGCCCTGCACTCTGGGACAAGCCCTGGAAACGGGGTCTAATACCGGATATGACTGTCCATCGCATGGTGGATGGTGTAAAGCTCCGGTGGTGCAAGATGATCCCGCGGCCTATCAGCTTGTTGGTGAAGTAGTGGCTC	Streptomyces sampsonii, 96.71%
T467	TTAAACATGCAAGTCGAACGATGAACCTCCTTCGGGAGGGGATTAGTGGCGAACGGGTGAGTAACACGTGGGCAATCTGCCCTGCACTCTGGGACAAGCCCTGGAAACGGGGTCTAATACCGGATACTGACCCGCTTGGGCATCCAAGCGGTTCGAAAGCTCCGGCGGTGCAGGATGAGCCCGCGGCCTATCAGCTTGTTGGTGAGGTAATGGCTCACCAAGGCAACGACGGGTAGCCGGCCTGAGAGGGCGACCGGCCACACTGGGACTGAGACACGGCCCAGACTCCTACGGGAGGCAGCAGTGGGGAATATTGCACAATGGGCGAAAGCCTGATGCAGCGACGCCGCGTGAGGGATGACGGCCTTCGGGTTGTAAACCTCTTTCAGCAGGGAAGAA…	Streptomyces variabilis,97.63%
ATCC 23862	ACGGAGAGTTTGATCCTGGCTCAGGACGAACGCTGGCGGCGTGCTTAACACATGCAAGTCGAACGATGAACCACTTCGGTGGGGATTAGTGGCGAACGGGTGAGTAACACGTGGGCAATCTGCCCTTCACTCTGGGACAAGCCCTGGAAACGGGGTCTAATACCGGATACGAGCCTCCAAGGCATCTTGGGGGTTGGAAAGCTCCGGCGGTGAAGGATGAGCCCGCGGCCTATCAGCTTGTTGGTGAGGTAATGGCTCACCAAGGCGACGACGGGTAGCCGGCCTGAGAGGGCGACCGGCCACACTGGGACTGAGACACGGCCCAGACTCCTACGGGAGGCAGCAGTGGGGAATATTGCACAATGGGCGAAAGCCTGATGCAGCGACGCCGCGTGAGGG…	Streptomyces durhamensis, 99.33%
ATCC 31975	ACGGAGAGTTTGATCCTGGCTCAGGACGAACGCTGGCGGCGTGCTTAACACATGCAAGTCGAACGATGAACCTCCTTCGGGAGGGGATTAGTGGCGAACGGGTGAGTAACACGTGGGCAATCTGCCCTTCACTCTGGGACAAGCCCTGGAAACGGGGTCTAATACCGGATACGACTACCGACCGCATGGTCTGGTGGTGGAAAGCTCCGGCGGTGAAGGATGAGCCCGCGGCCTATCAGCTTGTTGGTGGGGTGATGGCCTACCAAGGCGACGACGGGTAGCCGGCCTGAGAGGGCGACCGGCCACACTGGGACTGAGACACGGCCCAGACTCCTACGGGAGGCAGCAGTGGGGAATATTGCACAATGGGCGAAAGCCTGATGCAGCGACGCCGCGTGA…	Streptomyces nigrescens, 99.93%
*A: Soil-derived, Natural Organism Library SIFBI A*STAR, Singapore collection and T: Marine-derived, Natural Organism Library SIFBI A*STAR, Singapore Collection

## Sheet: Table S2
	Transformation efficiencies (%^)
Native strains ID	SpCas9 (Addgene)	pSET152 (Ref)
A1301	0	100
A5252	50	0
A8567	12.5	37.5
A33995	0	100
T265	66.6	100
T4680	0	100
A2278	0	100
A1090	75	100
A1532	0	100
A5858	12.5	87.5
A6562	0	100
A34001	0	12.5
T108	100	87.5
A2056	100	0
A61715	87.5	100
A80510	75	75
T298	50	40
A1636	0	100
A2957	0	50
A30639	0	100
A40707	0	12.5
A40926	100	100
A53961	87.5	100
Total Strains	12	21
^% of exconjugants that survives after restreaking on an antibiotics-containing plate (true positive transformants)

## Sheet: Table S3
Table S1. Global regulators
Regulator	Description	Accession code	Reference
AdpA	AraC/XylS transcriptor family protein	SCO 2792	Lee HN, Kim JS, Kim P, Lee HS, Kim ES. Repression of antibiotic downregulator WblA by AdpA in Streptomyces coelicolor. Appl. Environ. Microbiol.. 2013 Jul 1;79(13):4159-63.
FAS	Fatty acyl CoA synthase	SCO 6196	Wang, Weishan, et al. "Harnessing the intracellular triacylglycerols for titer improvement of polyketides in Streptomyces." Nature biotechnology 38.1 (2020): 76-83.
Crp	Cyclic AMP receptor protein	SCO 3571	Gao, Chan, et al. "Crp is a global regulator of antibiotic production in Streptomyces." MBio 3.6 (2012): e00407-12.
SarA	Putative membrane protein gene	SCO 4069	Ou X, Zhang B, Zhang L, Dong K, Liu C, Zhao G, Ding X. 2008. SarA influences the sporulation and secondary metabolism in Streptomyces coelicolor M145. Acta Biochim Biophys Sin (Shanghai) 40:877-882. http://dx.doi.org/10.1093/abbs/40.10.877.
RedD	AfsR/SARP family transcriptor regulator, RedD	SLIV 09220	Krause, Janina, et al. "Disclosing the potential of the SARP-type regulator PapR2 for the activation of antibiotic gene clusters in streptomycetes." Frontiers in microbiology 11 (2020): 225.

## Sheet: Table S4
	Number of exconjugants					Integration efficiencies (No of mutants with correct integration/strains screened)
Native strains ID	AdpA	FAS	Crp	SarA	RedD	AdpA	FAS	Crp	SarA	RedD
A1090	0	96	60	17	104	-	4/8	0/8	0/8	3/8
A1123	8	10	9	12	15	0/8	8/8	8/8	6/8	15/15
A1137	10	16	12	8	8	0/8	6/8	7/8	3/8	4/8
A1301	24	63	40	59	54	0/8	1/8	12/12	0/8	0/8
A1532	8	8	8	8	8	0/8	6/8	3/8	3/8	3/8
A1636	8	7	9	10	8	0/8	3/7	0/8	0/8	3/8
A2056	20	12	8	15	136	5/8	4/8	0/8	8/8	1/8
A2278	65	70	70	70	75	0/8	0/8	2/8	0/8	1/8
A2957	1	1	9	11	1	-	-	-	0/8	1/1
A5252	10	9	8	11	8	0/8	0/8	4/8	3/8	1/8
A5858	8	12	8	8	8	-	-	1/8	-	0/8
A6562	2	2	9	1	2	0/2	1/2	0/8	0/1	0/2
A8567	50	20	11	37	63	0/8	0/8	2/8	2/8	0/8
A30639	3	2	8	15	8	0/3	0/2	3/8	0/8	4/8
A33995	200	200	200	200	108	0/8	4/8	7/8	3/8	0/8
A34001	64	32	64	13	64	0/8	0/8	4/8	2/8	0/8
A40707	2	6	0	0	2	0/2	0/6	-	-	2/2
A40926	80	80	72	80	80	0/8	0/8	3/8	0/8	1/8
A53961	50	37	8	8	8	0/8	0/8	3/8	1/8	0/8
A61715	50	25	17	50	50	1/8	1/8	5/8	0/8	5/8
A80510	200	200	200	200	162	8/8	8/8	6/8	7/8	0/8
T108	14	7	12	0	0	0/8	2/7	1/8	-	-
T265	17	52	26	8	29	0/8	7/8	6/8	0/8	7/8
T298	45	20	21	50	75	0/8	8/8	4/8	0/8	7/8
T343	100	100	100	100	100	7/8	7/7	8/8	0/8	8/8
T354	100	100	100	100	100	1/5	1/5	0/8	0/8	3/8
T676	37	70	70	39	10	0/8	4/8	1/8	0/8	8/8
T1236	8	5	8	8	8	0/8	0/5	0/8	1/8	4/8
T4680	9	3	8	2	8	0/8	0/3	8/8	0/2	1/8
T36	8	20	7	7	10	0/8	0/7	2/7	0/7	1/7
T39	8	8	2	8	8	0/5	0/8	0/8	0/8	6/7
T175	10	16	8	16	16	0/4	0/5	1/6	0/3	0/4
T168	16	10	15	16	13	0/7	0/8	2/5	0/6	4/4
T118	16	11	10	12	16	0/7	2/4	3/6	0/3	0/2
T10	3	7	2	1	13	-	-	-	-	8/8
T1415	14	2	14	8	12	7/8	8/8	3/4	-	7/8
T1416	8	8	0	4	8	8/8	7/8	-	0/2	8/8
T12	6	3	5	1	15	2/6	3/3	0/5	0/1	8/8
A11345	0	0	0	2	0	-	-	-	1/2	-
A8274	0	1	2	1	0	-	0/1	1/2	1/1	-
A34053	10	4	20	50	54	-	-	2/5	1/2	-
A44034	8	20	20	12	0	1/8	2/8	-	-	-
A4217	10	50	10	5	0	3/4	4/8	2/3	-	-
A2705	0	10	4	1	0	0/2	1/4	0/1	0/2	-
A58051	0	10	0	2	1	-	4/8	-	-	-
ATCC 23862 (A100005)	8	0	10	3	0	3/4	-	2/4	0/3	-
ATCC 31975 (A100006)	0	1	0	0	0	-	1/1	-	-	-
T271	2	2	8	2	12	-	-	4/6	-	1/3
T302	9	10	50	18	50	-	0/1	2/3	0/4	3/5
T1312	100	100	100	100	100	1/8	2/7	2/8	0/6	6/8
T1195	10	0	0	0	3	-	-	-	-	2/3
T1425	100	100	100	100	100	5/8	0/8	4/8	0/8	4/8
T1628	70	30	60	40	100	1/6	0/3	1/5	0/5	0/8
T467	10	7	7	8	10	1/8	3/7	0/7	0/8	8/8

## Sheet: Table S5
No.	Native Strain ID	Activator
1	A1090	RED SarP integration
2	A1090	Crp integration
3	A1123	Crp integration
4	A1123	SarA integration
5	A1123	FAS integration
6	A1123	RED SarP integration
7	A11345	SarA integration
8	A1137	Crp integration
9	A1137	SarA integration
10	A1137	FAS integration
11	A1137	RED SarP integration
12	A1301	Crp integration
13	A1301	FAS integration
14	A1532	SarA integration
15	A1532	FAS integration
16	A1636	RED SarP integration
17	A1636	FAS integration
18	A2056	AdpA integration
19	A2056	SarA integration
20	A2056	FAS integration
21	A2056	RED SarP integration
22	A2278	Crp integration
23	A2278	RED SarP integration
24	A2705	FAS integration
25	A2957	RED SarP integration
26	A30639	Crp integration
27	A30639	RED SarP integration
28	A33995	Crp integration
29	A33995	SarA integration
30	A33995	FAS integration
31	A34001	Crp integration
32	A34001	SarA integration
33	A34053	Crp integration
34	A34053	SarA integration
35	A40707	RED SarP integration
36	A40926	Crp integration
37	A40926	RED SarP integration
38	A4217	AdpA integration
39	A4217	Crp integration
40	A4217	FAS integration
41	A44034	AdpA integration
42	A44034	Crp integration
43	A44034	FAS integration
44	A5252	Crp integration
45	A5252	SarA integration
46	A5252	RED SarP integration
47	A53961	Crp integration
48	A53961	SarA integration
49	A58051	FAS integration
50	A58051	RED SarP integration
51	A5858	Crp integration
52	A61715	AdpA integration
53	A61715	Crp integration
54	A61715	FAS integration
55	A61715	RED SarP integration
56	A6562	FAS integration
57	A80510	AdpA integration
58	A80510	Crp integration
59	A80510	SarA integration
60	A80510	FAS integration
61	A8274	Crp integration
62	A8274	SarA integration
63	A8567	Crp integration
64	A8567	FAS integration
65	ATCC 23862	AdpA integration
66	ATCC 23862	Crp integration
67	ATCC 31975	FAS integration
68	T10	RED SarP integration
69	T108	Crp integration
70	T108	FAS integration
71	T118	Crp integration
72	T1195	RED SarP integration
73	T12	AdpA integration
74	T12	FAS integration
75	T12	RED SarP integration
76	T1236	SarA integration
77	T1236	RED SarP integration
78	T1312	AdpA integration
79	T1312	Crp integration
80	T1312	FAS integration
81	T1312	RED SarP integration
82	T1415	AdpA integration
83	T1415	Crp integration
84	T1415	FAS integration
85	T1415	RED SarP integration
86	T1416	AdpA integration
87	T1416	FAS integration
88	T1416	RED SarP integration
89	T1425	AdpA integration
90	T1425	Crp integration
91	T1425	RED SarP integration
92	T1628	AdpA integration
93	T1628	Crp integration
94	T168	Crp integration
95	T168	RED SarP integration
96	T175	Crp integration
97	T265	Crp integration
98	T265	RED SarP integration
99	T265	FAS integration
100	T271	Crp integration
101	T271	RED SarP integration
102	T298	Crp integration
103	T298	FAS integration
104	T298	RED SarP integration
105	T302	Crp integration
106	T302	RED SarP integration
107	T343	AdpA integration
108	T343	Crp integration
109	T343	FAS integration
110	T343	RED SarP integration
111	T354	AdpA integration
112	T354	FAS integration
113	T354	RED SarP integration
114	T36	Crp integration
115	T36	RED SarP integration
116	T39	RED SarP integration
117	T467	AdpA integration
118	T467	FAS integration
119	T467	RED SarP integration
120	T4680	Crp integration
121	T4680	RED SarP integration
122	T676	Crp integration
123	T676	FAS integration
124	T676	RED SarP integration

## Sheet: Table S6
Strain	Native Strain ID	Modification	CA02LB	CA07LB	CA08LB	CA09LB	CA10LB
A100194	A1090	RedD integration	Y	Y	Y	Y	Y
A100195	A1090	RedD integration	Y	Y	Y	Y	Y
A100190	A1090	Crp integration	Y	Y	Y	Y	Y
A100191	A1090	Crp integration	Y	Y	Y	Y	Y
A100192	A1090	Crp integration	Y	Y	Y	Y	Y
A100193	A1090	Crp integration	Y	Y	Y	Y	Y
A100122	A1123	Crp integration	Y	Y	Y	Y	Y
A100123	A1123	Crp integration	Y	Y	Y	Y	Y
A100124	A1123	Crp integration	Y	Y	Y	Y	Y
A100125	A1123	Crp integration	Y	Y	Y	Y	Y
A100126	A1123	Crp integration	Y	Y	Y	Y	Y
A100127	A1123	Crp integration	Y	Y	Y	Y	Y
A100128	A1123	Crp integration	Y	Y	Y	Y	Y
A100129	A1123	Crp integration	Y	Y	Y	Y	Y
A100130	A1123	SarA integration	Y	Y	Y	Y	Y
A100131	A1123	SarA integration	Y	Y	Y	Y	Y
A100132	A1123	SarA integration	Y	Y	Y	Y	Y
A100133	A1123	SarA integration	Y	Y	Y	Y	Y
A100134	A1123	SarA integration	Y	Y	Y	Y	Y
A100135	A1123	SarA integration	Y	Y	Y	Y	Y
A100136	A1123	FAS integration	N	N	N	Y	N
A100137	A1123	FAS integration	Y	Y	Y	Y	Y
A100138	A1123	FAS integration	Y	Y	Y	Y	Y
A100139	A1123	FAS integration	Y	Y	Y	Y	Y
A100140	A1123	FAS integration	Y	N	N	N	Y
A100141	A1123	FAS integration	Y	Y	Y	Y	Y
A100143	A1123	FAS integration	Y	Y	Y	Y	Y
A100200	A1123	RedD integration	Y	Y	Y	Y	Y
A100201	A1123	RedD integration	Y	Y	Y	Y	Y
A100202	A1123	RedD integration	Y	Y	Y	Y	Y
A100203	A1123	RedD integration	Y	Y	Y	Y	Y
A100204	A1123	RedD integration	Y	Y	Y	Y	Y
A100205	A1123	RedD integration	Y	Y	Y	Y	Y
A100206	A1123	RedD integration	Y	Y	Y	Y	Y
A100207	A1123	RedD integration	Y	Y	Y	Y	Y
A100208	A1123	RedD integration	Y	Y	Y	Y	Y
A100209	A1123	RedD integration	Y	Y	Y	Y	Y
A100210	A1123	RedD integration	Y	Y	Y	Y	Y
A100211	A1123	RedD integration	Y	Y	Y	Y	Y
A100212	A1123	RedD integration	Y	Y	Y	Y	Y
A100213	A1123	RedD integration	Y	Y	Y	Y	Y
A100214	A1123	RedD integration	Y	Y	Y	Y	Y
A100026	A11345	SarA integration	Y	Y	Y	Y	Y
A100062	A1137	Crp integration	Y	Y	Y	Y	Y
A100063	A1137	Crp integration	Y	Y	Y	Y	Y
A100064	A1137	Crp integration	Y	Y	Y	Y	Y
A100065	A1137	Crp integration	Y	Y	Y	Y	Y
A100066	A1137	Crp integration	Y	Y	Y	Y	Y
A100067	A1137	Crp integration	Y	Y	Y	Y	Y
A100068	A1137	Crp integration	Y	Y	Y	Y	Y
A100069	A1137	SarA integration	Y	Y	Y	Y	Y
A100070	A1137	SarA integration	Y	Y	Y	Y	Y
A100071	A1137	SarA integration	Y	Y	Y	Y	Y
A100072	A1137	FAS integration	Y	Y	Y	Y	Y
A100073	A1137	FAS integration	Y	Y	Y	Y	Y
A100074	A1137	FAS integration	Y	Y	Y	Y	Y
A100075	A1137	FAS integration	Y	Y	Y	Y	Y
A100076	A1137	FAS integration	Y	Y	Y	Y	Y
A100077	A1137	FAS integration	Y	Y	Y	Y	Y
A100230	A1137	RedD integration	Y	N	N	Y	Y
A100231	A1137	RedD integration	Y	N	N	Y	Y
A100232	A1137	RedD integration	Y	N	N	Y	Y
A100233	A1137	RedD integration	Y	N	N	Y	Y
A100178	A1301	Crp integration	Y	Y	Y	Y	Y
A100179	A1301	Crp integration	Y	Y	Y	Y	Y
A100180	A1301	Crp integration	Y	Y	Y	Y	Y
A100181	A1301	Crp integration	Y	Y	Y	Y	Y
A100182	A1301	Crp integration	Y	Y	Y	Y	Y
A100183	A1301	Crp integration	Y	Y	Y	Y	Y
A100184	A1301	Crp integration	Y	Y	Y	Y	Y
A100185	A1301	Crp integration	Y	Y	Y	Y	Y
A100186	A1301	Crp integration	Y	Y	Y	Y	Y
A100187	A1301	Crp integration	Y	Y	Y	Y	Y
A100188	A1301	Crp integration	Y	Y	Y	Y	Y
A100189	A1301	Crp integration	Y	Y	Y	Y	Y
A100174	A1301	FAS integration	Y	Y	Y	Y	Y
A100278	A1532	SarA integration	Y	N	N	Y	Y
A100280	A1532	SarA integration	Y	N	N	Y	Y
A100281	A1532	FAS integration	Y	N	N	Y	Y
A100282	A1532	FAS integration	Y	N	N	Y	Y
A100289	A1636	RedD integration	Y	N	N	Y	Y
A100290	A1636	RedD integration	Y	N	N	Y	Y
A100291	A1636	RedD integration	Y	N	N	Y	Y
A100286	A1636	FAS integration	Y	N	N	Y	Y
A100287	A1636	FAS integration	Y	N	N	Y	Y
A100288	A1636	FAS integration	Y	N	N	Y	Y
A100105	A2056	AdpA integration	Y	Y	Y	Y	Y
A100106	A2056	AdpA integration	Y	Y	Y	Y	Y
A100107	A2056	AdpA integration	Y	Y	Y	Y	Y
A100108	A2056	AdpA integration	Y	Y	Y	Y	Y
A100109	A2056	AdpA integration	Y	Y	Y	Y	Y
A100110	A2056	SarA integration	Y	Y	Y	Y	Y
A100111	A2056	SarA integration	Y	Y	Y	Y	Y
A100112	A2056	SarA integration	Y	Y	Y	Y	Y
A100113	A2056	SarA integration	Y	Y	Y	Y	Y
A100114	A2056	SarA integration	Y	Y	Y	Y	Y
A100115	A2056	SarA integration	Y	Y	Y	Y	Y
A100116	A2056	SarA integration	Y	Y	Y	Y	Y
A100117	A2056	SarA integration	Y	Y	Y	Y	Y
A100118	A2056	FAS integration	Y	Y	Y	Y	Y
A100119	A2056	FAS integration	Y	Y	Y	Y	Y
A100120	A2056	FAS integration	Y	Y	Y	Y	Y
A100121	A2056	FAS integration	Y	Y	Y	Y	Y
A100259	A2056	RedD integration	Y	N	N	Y	Y
A100234	A2278	Crp integration	Y	N	N	Y	Y
A100235	A2278	Crp integration	Y	N	N	Y	Y
A100236	A2278	RedD integration	Y	N	N	Y	Y
A100032	A2705	FAS integration	Y	Y	Y	Y	Y
A100261	A2957	RedD integration	Y	N	N	Y	Y
A100311	A30639	Crp integration	Y	N	N	Y	Y
A100312	A30639	Crp integration	Y	N	N	Y	Y
A100313	A30639	Crp integration	Y	N	N	Y	Y
A100314	A30639	RedD integration	Y	N	N	Y	Y
A100315	A30639	RedD integration	Y	N	N	Y	Y
A100316	A30639	RedD integration	Y	N	N	Y	Y
A100317	A30639	RedD integration	Y	N	N	Y	Y
A100037	A33995	Crp integration	Y	Y	Y	Y	Y
A100038	A33995	Crp integration	Y	Y	Y	Y	Y
A100039	A33995	Crp integration	Y	Y	Y	Y	Y
A100040	A33995	Crp integration	Y	Y	Y	Y	Y
A100041	A33995	Crp integration	Y	Y	Y	Y	Y
A100042	A33995	Crp integration	Y	Y	Y	Y	Y
A100043	A33995	Crp integration	Y	Y	Y	Y	Y
A100044	A33995	SarA integration	Y	Y	Y	Y	Y
A100045	A33995	SarA integration	Y	Y	Y	Y	Y
A100046	A33995	SarA integration	Y	Y	Y	Y	Y
A100047	A33995	FAS integration	Y	Y	Y	Y	Y
A100048	A33995	FAS integration	Y	Y	Y	Y	Y
A100049	A33995	FAS integration	Y	Y	Y	Y	Y
A100050	A33995	FAS integration	Y	Y	Y	Y	Y
A100266	A34001	Crp integration	Y	N	N	Y	Y
A100267	A34001	Crp integration	Y	N	N	Y	Y
A100268	A34001	Crp integration	Y	N	N	Y	Y
A100269	A34001	Crp integration	Y	N	N	Y	Y
A100270	A34001	SarA integration	Y	N	N	Y	Y
A100271	A34001	SarA integration	Y	N	N	Y	Y
A100033	A34053	Crp integration	Y	Y	Y	Y	Y
A100034	A34053	Crp integration	Y	Y	Y	Y	Y
A100035	A34053	SarA integration	Y	Y	Y	Y	Y
A100228	A40707	RedD integration	Y	N	N	Y	Y
A100229	A40707	RedD integration	Y	N	N	Y	Y
A100322	A40926	Crp integration	Y	N	N	Y	Y
A100323	A40926	Crp integration	Y	N	N	Y	Y
A100324	A40926	Crp integration	Y	N	N	Y	Y
A100325	A40926	RedD integration	Y	N	N	Y	Y
A100007	A4217	AdpA integration	Y	Y	Y	Y	Y
A100008	A4217	AdpA integration	Y	Y	Y	Y	Y
A100009	A4217	AdpA integration	Y	Y	Y	Y	Y
A100010	A4217	Crp integration	Y	Y	Y	Y	Y
A100011	A4217	Crp integration	Y	Y	Y	Y	Y
A100012	A4217	FAS integration	Y	Y	Y	Y	Y
A100013	A4217	FAS integration	Y	Y	Y	Y	Y
A100014	A4217	FAS integration	Y	Y	Y	Y	Y
A100015	A4217	FAS integration	Y	Y	Y	Y	Y
A100016	A44034	AdpA integration	Y	Y	Y	Y	Y
A100017	A44034	Crp integration	Y	Y	Y	Y	Y
A100018	A44034	FAS integration	Y	Y	Y	Y	Y
A100019	A44034	FAS integration	Y	Y	Y	Y	Y
A100055	A5252	Crp integration	Y	Y	Y	Y	Y
A100056	A5252	Crp integration	Y	Y	Y	Y	Y
A100058	A5252	Crp integration	Y	Y	Y	Y	Y
A100060	A5252	SarA integration	Y	Y	Y	Y	Y
A100061	A5252	SarA integration	Y	Y	Y	Y	Y
A100196	A5252	RedD integration	Y	Y	Y	Y	Y
A100273	A53961	Crp integration	Y	N	N	Y	Y
A100274	A53961	Crp integration	Y	N	N	Y	Y
A100275	A53961	Crp integration	Y	N	N	Y	Y
A100276	A53961	SarA integration	Y	N	N	Y	Y
A100020	A58051	FAS integration	Y	Y	Y	Y	Y
A100021	A58051	FAS integration	Y	Y	Y	Y	Y
A100022	A58051	FAS integration	Y	Y	Y	Y	Y
A100023	A58051	FAS integration	Y	Y	Y	Y	Y
A100292	A58051	RedD integration	Y	N	N	Y	Y
A100263	A5858	Crp integration	Y	N	N	Y	Y
A100151	A61715	AdpA integration	Y	Y	Y	Y	Y
A100152	A61715	Crp integration	Y	Y	Y	Y	Y
A100153	A61715	Crp integration	Y	Y	Y	Y	Y
A100154	A61715	Crp integration	Y	Y	Y	Y	Y
A100155	A61715	Crp integration	Y	Y	Y	Y	Y
A100156	A61715	Crp integration	Y	Y	Y	Y	Y
A100157	A61715	FAS integration	Y	Y	Y	Y	Y
A100158	A61715	RedD integration	Y	Y	Y	Y	Y
A100159	A61715	RedD integration	Y	Y	Y	Y	Y
A100160	A61715	RedD integration	Y	Y	Y	Y	Y
A100161	A61715	RedD integration	Y	Y	Y	Y	Y
A100162	A61715	RedD integration	Y	Y	Y	Y	Y
A100283	A6562	FAS integration	Y	N	N	Y	Y
A100078	A80510	AdpA integration	Y	Y	Y	Y	Y
A100079	A80510	AdpA integration	Y	Y	Y	Y	Y
A100080	A80510	AdpA integration	Y	Y	Y	Y	Y
A100081	A80510	AdpA integration	Y	Y	Y	Y	Y
A100082	A80510	AdpA integration	Y	Y	Y	Y	Y
A100083	A80510	AdpA integration	Y	Y	Y	Y	Y
A100084	A80510	AdpA integration	Y	Y	Y	Y	Y
A100085	A80510	AdpA integration	Y	Y	Y	Y	Y
A100086	A80510	Crp integration	Y	Y	Y	Y	Y
A100087	A80510	Crp integration	Y	Y	Y	Y	Y
A100088	A80510	Crp integration	Y	Y	Y	Y	Y
A100089	A80510	Crp integration	Y	Y	Y	Y	Y
A100090	A80510	Crp integration	Y	Y	Y	Y	Y
A100091	A80510	Crp integration	Y	Y	Y	Y	Y
A100092	A80510	SarA integration	Y	Y	Y	Y	Y
A100093	A80510	SarA integration	Y	Y	Y	Y	Y
A100094	A80510	SarA integration	Y	Y	Y	Y	Y
A100095	A80510	SarA integration	Y	Y	Y	Y	Y
A100096	A80510	SarA integration	Y	Y	Y	Y	Y
A100097	A80510	SarA integration	Y	Y	Y	Y	Y
A100098	A80510	SarA integration	Y	Y	Y	Y	Y
A100099	A80510	FAS integration	Y	Y	Y	Y	Y
A100102	A80510	FAS integration	Y	Y	Y	Y	Y
A100024	A8274	Crp integration	Y	Y	Y	Y	Y
A100025	A8274	SarA integration	Y	Y	Y	Y	Y
A100051	A8567	Crp integration	Y	Y	Y	Y	Y
A100052	A8567	Crp integration	Y	Y	Y	Y	Y
A100053	A8567	FAS integration	Y	Y	Y	Y	Y
A100054	A8567	FAS integration	Y	Y	Y	Y	Y
A100027	ATCC 23862	AdpA integration	Y	Y	Y	Y	Y
A100028	ATCC 23862	AdpA integration	Y	Y	Y	Y	Y
A100029	ATCC 23862	AdpA integration	Y	Y	Y	Y	Y
A100030	ATCC 23862	Crp integration	Y	Y	Y	Y	Y
A100031	ATCC 23862	Crp integration	Y	Y	Y	Y	Y
A100036	ATCC 31975	FAS integration	Y	Y	Y	Y	Y
A1090	A1090	N.A.	Y	Y	Y	Y	Y
A1123	A1123	N.A.	Y	Y	Y	Y	Y
A11345	A11345	N.A.	Y	Y	Y	Y	Y
A1137	A1137	N.A.	Y	Y	Y	Y	Y
A1301	A1301	N.A.	Y	Y	Y	Y	Y
A1532	A1532	N.A.	Y	N	N	Y	Y
A1636	A1636	N.A.	Y	N	N	Y	Y
A2056	A2056	N.A.	Y	Y	Y	Y	Y
A2278	A2278	N.A.	Y	N	N	Y	Y
A2705	A2705	N.A.	Y	Y	Y	Y	Y
A2957	A2957	N.A.	Y	N	N	Y	Y
A30639	A30639	N.A.	Y	N	N	Y	Y
A33995	A33995	N.A.	Y	Y	Y	Y	Y
A34001	A34001	N.A.	Y	N	N	Y	Y
A34053	A34053	N.A.	Y	Y	Y	Y	Y
A40707	A40707	N.A.	Y	N	N	Y	Y
A40926	A40926	N.A.	Y	N	N	Y	Y
A4217	A4217	N.A.	Y	Y	Y	Y	Y
A44034	A44034	N.A.	Y	Y	Y	Y	Y
A5252	A5252	N.A.	Y	Y	Y	Y	Y
A53961	A53961	N.A.	Y	N	N	Y	Y
A58051	A58051	N.A.	Y	Y	Y	Y	Y
A5858	A5858	N.A.	Y	N	N	Y	Y
A61715	A61715	N.A.	Y	Y	Y	Y	Y
A6562	A6562	N.A.	Y	N	N	Y	Y
A80510	A80510	N.A.	Y	Y	Y	Y	Y
A8274	A8274	N.A.	Y	Y	Y	Y	Y
A8567	A8567	N.A.	Y	Y	Y	Y	Y
ATCC 23862	ATCC 23862	N.A.	Y	Y	Y	Y	Y
ATCC 31975	ATCC 31975	N.A.	Y	Y	Y	Y	Y
			MCA02LB	MCA07LB	MCA08LB	MCA09LB	MCA10LB
T10163	T10	RedD integration	N	Y	Y	Y	N
T10164	T10	RedD integration	N	Y	Y	Y	N
T10165	T10	RedD integration	N	Y	Y	Y	N
T10166	T10	RedD integration	N	Y	Y	Y	N
T10167	T10	RedD integration	N	Y	Y	Y	N
T10168	T10	RedD integration	N	Y	Y	Y	N
T10169	T10	RedD integration	N	Y	Y	Y	N
T10170	T10	RedD integration	N	Y	Y	Y	N
T10057	T108	Crp integration	Y	Y	Y	Y	Y
T10058	T108	FAS integration	Y	Y	Y	Y	Y
T10059	T108	FAS integration	Y	Y	Y	Y	Y
T10159	T118	Crp integration	N	Y	Y	Y	N
T10160	T118	Crp integration	N	Y	Y	Y	N
T10161	T118	Crp integration	N	Y	Y	Y	N
T10266	T1195	RedD integration	N	Y	Y	Y	N
T10267	T1195	RedD integration	N	Y	Y	Y	N
T10234	T12	AdpA integration	N	Y	Y	Y	N
T10235	T12	AdpA integration	N	Y	Y	Y	N
T10236	T12	FAS integration	N	Y	Y	Y	N
T10237	T12	FAS integration	N	Y	Y	Y	N
T10238	T12	FAS integration	N	Y	Y	Y	N
T10239	T12	RedD integration	N	Y	Y	Y	N
T10240	T12	RedD integration	N	Y	Y	Y	N
T10241	T12	RedD integration	N	Y	Y	Y	N
T10242	T12	RedD integration	N	Y	Y	Y	N
T10243	T12	RedD integration	N	Y	Y	Y	N
T10244	T12	RedD integration	N	Y	Y	Y	N
T10245	T12	RedD integration	N	Y	Y	Y	N
T10246	T12	RedD integration	N	Y	Y	Y	N
T10060	T1236	SarA integration	Y	Y	Y	Y	Y
T10061	T1236	RedD integration	Y	Y	Y	Y	Y
T10062	T1236	RedD integration	Y	Y	Y	Y	Y
T10063	T1236	RedD integration	Y	Y	Y	Y	Y
T10064	T1236	RedD integration	Y	Y	Y	Y	Y
T10255	T1312	AdpA integration	N	Y	Y	Y	N
T10256	T1312	Crp integration	N	Y	Y	Y	N
T10257	T1312	Crp integration	N	Y	Y	Y	N
T10258	T1312	FAS integration	N	Y	Y	Y	N
T10259	T1312	FAS integration	N	Y	Y	Y	N
T10260	T1312	RedD integration	N	Y	Y	Y	N
T10261	T1312	RedD integration	N	Y	Y	Y	N
T10262	T1312	RedD integration	N	Y	Y	Y	N
T10263	T1312	RedD integration	N	Y	Y	Y	N
T10264	T1312	RedD integration	N	Y	Y	Y	N
T10265	T1312	RedD integration	N	Y	Y	Y	N
T10171	T1415	AdpA integration	N	Y	Y	Y	N
T10172	T1415	AdpA integration	N	Y	Y	Y	N
T10173	T1415	AdpA integration	N	Y	Y	Y	N
T10174	T1415	AdpA integration	N	Y	Y	Y	N
T10175	T1415	AdpA integration	N	Y	Y	Y	N
T10176	T1415	AdpA integration	N	Y	Y	Y	N
T10177	T1415	AdpA integration	N	Y	Y	Y	N
T10178	T1415	Crp integration	N	Y	Y	Y	N
T10179	T1415	Crp integration	N	Y	Y	Y	N
T10180	T1415	Crp integration	N	Y	Y	Y	N
T10181	T1415	FAS integration	N	Y	Y	Y	N
T10182	T1415	FAS integration	N	Y	Y	Y	N
T10183	T1415	FAS integration	N	Y	Y	Y	N
T10184	T1415	FAS integration	N	Y	Y	Y	N
T10185	T1415	FAS integration	N	Y	Y	Y	N
T10186	T1415	FAS integration	N	Y	Y	Y	N
T10187	T1415	FAS integration	N	Y	Y	Y	N
T10188	T1415	FAS integration	N	Y	Y	Y	N
T10189	T1415	RedD integration	N	Y	Y	Y	N
T10190	T1415	RedD integration	N	Y	Y	Y	N
T10191	T1415	RedD integration	N	Y	Y	Y	N
T10192	T1415	RedD integration	N	Y	Y	Y	N
T10193	T1415	RedD integration	N	Y	Y	Y	N
T10194	T1415	RedD integration	N	Y	Y	Y	N
T10195	T1415	RedD integration	N	Y	Y	Y	N
T10204	T1416	AdpA integration	N	Y	Y	Y	N
T10205	T1416	AdpA integration	N	Y	Y	Y	N
T10206	T1416	AdpA integration	N	Y	Y	Y	N
T10207	T1416	AdpA integration	N	Y	Y	Y	N
T10208	T1416	AdpA integration	N	Y	Y	Y	N
T10209	T1416	AdpA integration	N	Y	Y	Y	N
T10210	T1416	AdpA integration	N	Y	Y	Y	N
T10211	T1416	AdpA integration	N	Y	Y	Y	N
T10212	T1416	FAS integration	N	Y	Y	Y	N
T10213	T1416	FAS integration	N	Y	Y	Y	N
T10214	T1416	FAS integration	N	Y	Y	Y	N
T10215	T1416	FAS integration	N	Y	Y	Y	N
T10216	T1416	FAS integration	N	Y	Y	Y	N
T10217	T1416	FAS integration	N	Y	Y	Y	N
T10218	T1416	FAS integration	N	Y	Y	Y	N
T10219	T1416	RedD integration	N	Y	Y	Y	N
T10220	T1416	RedD integration	N	Y	Y	Y	N
T10221	T1416	RedD integration	N	Y	Y	Y	N
T10222	T1416	RedD integration	N	Y	Y	Y	N
T10223	T1416	RedD integration	N	Y	Y	Y	N
T10224	T1416	RedD integration	N	Y	Y	Y	N
T10225	T1416	RedD integration	N	Y	Y	Y	N
T10226	T1416	RedD integration	N	Y	Y	Y	N
T10268	T1425	AdpA integration	N	Y	Y	Y	N
T10269	T1425	AdpA integration	N	Y	Y	Y	N
T10270	T1425	AdpA integration	N	Y	Y	Y	N
T10271	T1425	AdpA integration	N	Y	Y	Y	N
T10272	T1425	AdpA integration	N	Y	Y	Y	N
T10273	T1425	Crp integration	N	Y	Y	Y	N
T10274	T1425	Crp integration	N	Y	Y	Y	N
T10275	T1425	Crp integration	N	Y	Y	Y	N
T10276	T1425	Crp integration	N	Y	Y	Y	N
T10277	T1425	RedD integration	N	Y	Y	Y	N
T10278	T1425	RedD integration	N	Y	Y	Y	N
T10279	T1425	RedD integration	N	Y	Y	Y	N
T10280	T1425	RedD integration	N	Y	Y	Y	N
T10292	T1628	AdpA integration	N	Y	Y	Y	N
T10293	T1628	Crp integration	N	Y	Y	Y	N
T10153	T168	Crp integration	N	Y	Y	Y	N
T10154	T168	Crp integration	N	Y	Y	Y	N
T10155	T168	RedD integration	N	Y	Y	Y	N
T10156	T168	RedD integration	N	Y	Y	Y	N
T10157	T168	RedD integration	N	Y	Y	Y	N
T10158	T168	RedD integration	N	Y	Y	Y	N
T10162	T175	Crp integration	N	Y	Y	Y	N
T10034	T265	Crp integration	Y	Y	Y	Y	Y
T10035	T265	Crp integration	Y	Y	Y	Y	Y
T10036	T265	Crp integration	Y	Y	Y	Y	Y
T10037	T265	Crp integration	Y	Y	Y	Y	Y
T10038	T265	Crp integration	Y	Y	Y	Y	Y
T10039	T265	Crp integration	Y	Y	Y	Y	Y
T10047	T265	RedD integration	Y	Y	Y	Y	Y
T10048	T265	RedD integration	Y	Y	Y	Y	Y
T10049	T265	RedD integration	Y	Y	Y	Y	Y
T10050	T265	RedD integration	Y	Y	Y	Y	Y
T10051	T265	RedD integration	Y	Y	Y	Y	Y
T10052	T265	RedD integration	Y	Y	Y	Y	Y
T10053	T265	RedD integration	Y	Y	Y	Y	Y
T10040	T265	FAS integration	Y	Y	Y	Y	Y
T10041	T265	FAS integration	Y	Y	Y	Y	Y
T10042	T265	FAS integration	Y	Y	Y	Y	Y
T10043	T265	FAS integration	Y	Y	Y	Y	Y
T10044	T265	FAS integration	Y	Y	Y	Y	Y
T10045	T265	FAS integration	Y	Y	Y	Y	Y
T10046	T265	FAS integration	Y	Y	Y	Y	Y
T10125	T271	Crp integration	N	Y	Y	Y	N
T10126	T271	Crp integration	N	Y	Y	Y	N
T10127	T271	Crp integration	N	Y	Y	Y	N
T10128	T271	Crp integration	N	Y	Y	Y	N
T10129	T271	RedD integration	N	Y	Y	Y	N
T10001	T298	Crp integration	Y	Y	Y	Y	Y
T10002	T298	Crp integration	Y	Y	Y	Y	Y
T10003	T298	Crp integration	Y	Y	Y	Y	Y
T10004	T298	Crp integration	Y	Y	Y	Y	Y
T10005	T298	FAS integration	Y	Y	Y	Y	Y
T10006	T298	FAS integration	Y	Y	Y	Y	Y
T10007	T298	FAS integration	Y	Y	Y	Y	Y
T10008	T298	FAS integration	Y	Y	Y	Y	Y
T10009	T298	FAS integration	Y	Y	Y	Y	Y
T10010	T298	FAS integration	Y	Y	Y	Y	Y
T10011	T298	FAS integration	Y	Y	Y	Y	Y
T10022	T298	RedD integration	Y	Y	Y	Y	Y
T10023	T298	RedD integration	Y	Y	Y	Y	Y
T10024	T298	RedD integration	Y	Y	Y	Y	Y
T10025	T298	RedD integration	Y	Y	Y	Y	Y
T10026	T298	RedD integration	Y	Y	Y	Y	Y
T10027	T298	RedD integration	Y	Y	Y	Y	Y
T10028	T298	RedD integration	Y	Y	Y	Y	Y
T10130	T302	Crp integration	N	Y	Y	Y	N
T10131	T302	Crp integration	N	Y	Y	Y	N
T10132	T302	RedD integration	N	Y	Y	Y	N
T10133	T302	RedD integration	N	Y	Y	Y	N
T10134	T302	RedD integration	N	Y	Y	Y	N
T10068	T343	AdpA integration	Y	Y	Y	Y	Y
T10069	T343	AdpA integration	Y	Y	Y	Y	Y
T10070	T343	AdpA integration	Y	Y	Y	Y	Y
T10071	T343	Crp integration	Y	Y	Y	Y	Y
T10072	T343	Crp integration	Y	Y	Y	Y	Y
T10073	T343	Crp integration	Y	Y	Y	Y	Y
T10074	T343	Crp integration	Y	Y	Y	Y	Y
T10075	T343	Crp integration	Y	Y	Y	Y	Y
T10076	T343	Crp integration	Y	Y	Y	Y	Y
T10077	T343	Crp integration	Y	Y	Y	Y	Y
T10078	T343	Crp integration	Y	Y	Y	Y	Y
T10079	T343	FAS integration	Y	Y	Y	Y	Y
T10080	T343	FAS integration	Y	Y	Y	Y	Y
T10081	T343	FAS integration	Y	Y	Y	Y	Y
T10082	T343	FAS integration	Y	Y	Y	Y	Y
T10083	T343	FAS integration	Y	Y	Y	Y	Y
T10084	T343	FAS integration	Y	Y	Y	Y	Y
T10085	T343	FAS integration	Y	Y	Y	Y	Y
T10086	T343	RedD integration	Y	Y	Y	Y	Y
T10087	T343	RedD integration	Y	Y	Y	Y	Y
T10088	T343	RedD integration	Y	Y	Y	Y	Y
T10089	T343	RedD integration	Y	Y	Y	Y	Y
T10090	T343	RedD integration	Y	Y	Y	Y	Y
T10091	T343	RedD integration	Y	Y	Y	Y	Y
T10092	T343	RedD integration	Y	Y	Y	Y	Y
T10093	T343	RedD integration	Y	Y	Y	Y	Y
T10117	T354	AdpA integration	Y	Y	Y	Y	Y
T10118	T354	FAS integration	Y	Y	Y	Y	Y
T10119	T354	RedD integration	Y	Y	Y	Y	Y
T10120	T354	RedD integration	Y	Y	Y	Y	Y
T10121	T354	RedD integration	Y	Y	Y	Y	Y
T10135	T36	Crp integration	N	Y	Y	Y	N
T10136	T36	Crp integration	N	Y	Y	Y	N
T10137	T36	RedD integration	N	Y	Y	Y	N
T10138	T39	RedD integration	N	Y	Y	Y	N
T10139	T39	RedD integration	N	Y	Y	Y	N
T10140	T39	RedD integration	N	Y	Y	Y	N
T10141	T39	RedD integration	N	Y	Y	Y	N
T10142	T39	RedD integration	N	Y	Y	Y	N
T10143	T39	RedD integration	N	Y	Y	Y	N
T10295	T467	AdpA integration	N	Y	Y	Y	N
T10296	T467	FAS integration	N	Y	Y	Y	N
T10297	T467	FAS integration	N	Y	Y	Y	N
T10298	T467	FAS integration	N	Y	Y	Y	N
T10299	T467	RedD integration	N	Y	Y	Y	N
T10300	T467	RedD integration	N	Y	Y	Y	N
T10301	T467	RedD integration	N	Y	Y	Y	N
T10302	T467	RedD integration	N	Y	Y	Y	N
T10303	T467	RedD integration	N	Y	Y	Y	N
T10304	T467	RedD integration	N	Y	Y	Y	N
T10305	T467	RedD integration	N	Y	Y	Y	N
T10306	T467	RedD integration	N	Y	Y	Y	N
T10012	T4680	Crp integration	Y	Y	Y	Y	Y
T10013	T4680	Crp integration	Y	Y	Y	Y	Y
T10014	T4680	Crp integration	Y	Y	Y	Y	Y
T10015	T4680	Crp integration	Y	Y	Y	Y	Y
T10016	T4680	Crp integration	Y	Y	Y	Y	Y
T10017	T4680	Crp integration	Y	Y	Y	Y	Y
T10018	T4680	Crp integration	Y	Y	Y	Y	Y
T10019	T4680	Crp integration	Y	Y	Y	Y	Y
T10020	T4680	RedD integration	Y	Y	Y	Y	Y
T10103	T676	Crp integration	Y	Y	Y	Y	Y
T10104	T676	FAS integration	Y	Y	Y	Y	Y
T10105	T676	FAS integration	Y	Y	Y	Y	Y
T10106	T676	FAS integration	Y	Y	Y	Y	Y
T10107	T676	FAS integration	Y	Y	Y	Y	Y
T10108	T676	RedD integration	Y	Y	Y	Y	Y
T10109	T676	RedD integration	Y	Y	Y	Y	Y
T10110	T676	RedD integration	Y	Y	Y	Y	Y
T10111	T676	RedD integration	Y	Y	Y	Y	Y
T10112	T676	RedD integration	Y	Y	Y	Y	Y
T10113	T676	RedD integration	Y	Y	Y	Y	Y
T10114	T676	RedD integration	Y	Y	Y	Y	Y
T10115	T676	RedD integration	Y	Y	Y	Y	Y
T10	T10	N.A.	N	Y	Y	Y	N
T108	T108	N.A.	Y	Y	Y	Y	Y
T118	T118	N.A.	N	Y	Y	Y	N
T1195	T1195	N.A.	N	Y	Y	Y	N
T12	T12	N.A.	N	Y	Y	Y	N
T1236	T1236	N.A.	Y	Y	Y	Y	Y
T1312	T1312	N.A.	N	Y	Y	Y	N
T1415	T1415	N.A.	N	Y	Y	Y	N
T1416	T1416	N.A.	N	Y	Y	Y	N
T1425	T1425	N.A.	N	Y	Y	Y	N
T1628	T1628	N.A.	N	Y	Y	Y	N
T168	T168	N.A.	N	Y	Y	Y	N
T175	T175	N.A.	N	Y	Y	Y	N
T265	T265	N.A.	Y	Y	Y	Y	Y
T271	T271	N.A.	N	Y	Y	Y	N
T298	T298	N.A.	Y	Y	Y	Y	Y
T302	T302	N.A.	N	Y	Y	Y	N
T343	T343	N.A.	Y	Y	Y	Y	Y
T354	T354	N.A.	Y	Y	Y	Y	Y
T36	T36	N.A.	N	Y	Y	Y	N
T39	T39	N.A.	N	Y	Y	Y	N
T467	T467	N.A.	N	Y	Y	Y	N
T4680	T4680	N.A.	Y	Y	Y	Y	Y
T676	T676	N.A.	Y	Y	Y	Y	Y
